# Supplementary material for: Reactions of aryl dimethylphosphinothioate esters with anionic oxygen nucleophiles: transition state structure in 70% water–30% ethanol
Source: Royal Society of Chemistry journal article supplement (doi:10.1039/d0ra10759j), 2021-01-01
Supplement: d0ra10759j1.pdf [file d0ra10759j1.pdf]

**THIOPHOSPHINOYL TRANSFER FROM ARYL  
DIMETHYLPHOSPHINOTHIOATE ESTERS TO ANIONIC OXYGEN  
NUCLEOPHILES: THE EFFECT OF SOLVENT POLARITY ON THE TRANSITION  
STATE<sup>†</sup>**

Georgina I. Kalu,<sup>a</sup> Cornelius I. Ubochi<sup>a</sup> and Ikenna Onyido<sup>b\*</sup>

<sup>a</sup>Department of Chemistry, Imo State University, Owerri, Nigeria

<sup>b</sup>Department of Pure and Industrial Chemistry, Nnamdi Azikiwe University, Awka, Nigeria

**Electronic Supplementary Information**

**Table S1**

Pseudo-First-Order Rate Constants ( $k_{obs}/s^{-1}$ ) for the Reaction of 4-Nitrophenyl Dimethylphosphinates (**3a**)<sup>a</sup> with Oxyanionic Nucleophiles in 70% Water-30% Ethanol (v/v) at 25°C<sup>b</sup>

|    |                                                                                                                                                                                                                                         |             |              |              |              |              |              |
|----|-----------------------------------------------------------------------------------------------------------------------------------------------------------------------------------------------------------------------------------------|-------------|--------------|--------------|--------------|--------------|--------------|
| A. | Nucleophile = HO <sup>-</sup><br>10 <sup>4</sup> [HO <sup>-</sup> ]/M<br>10 <sup>4</sup> $k_{obs}/s^{-1}$                                                                                                                               | 5.0<br>2.60 | 10.0<br>3.10 | 20.0<br>3.80 | 30.0<br>4.74 | 40.0<br>5.64 | 50.0<br>6.39 |
| B. | Nucleophile = CHCl <sub>2</sub> CH <sub>2</sub> O <sup>-</sup><br>10 <sup>4</sup> [CHCl <sub>2</sub> CH <sub>2</sub> O <sup>-</sup> ]/M<br>10 <sup>5</sup> $k_{obs}/s^{-1}$                                                             | 5.0<br>3.04 | 10.0<br>6.03 | 20.0<br>12.5 | 30.0<br>18.3 | 40.0<br>24.4 | 50.0<br>30.0 |
| C. | Nucleophile = CF <sub>3</sub> CH <sub>2</sub> O <sup>-</sup><br>10 <sup>4</sup> [CF <sub>3</sub> CH <sub>2</sub> O <sup>-</sup> ]/M<br>10 <sup>5</sup> $k_{obs}/s^{-1}$                                                                 | 5.0<br>2.05 | 10.0<br>4.27 | 20.0<br>8.55 | 30.0<br>13.1 | 40.0<br>16.6 | 50.0<br>21.5 |
| D. | Nucleophile = CF <sub>3</sub> (CF <sub>2</sub> ) <sub>2</sub> CH <sub>2</sub> O <sup>-</sup><br>10 <sup>4</sup> [CF <sub>3</sub> (CF <sub>2</sub> ) <sub>2</sub> CH <sub>2</sub> O <sup>-</sup> ]/M<br>10 <sup>5</sup> $k_{obs}/s^{-1}$ | 5.0<br>1.46 | 10.0<br>2.55 | 20.0<br>5.07 | 30.0<br>7.63 | 40.0<br>10.1 | 50.0<br>12.8 |
| E. | Nucleophile = 4-MeOPhO <sup>-</sup><br>10 <sup>4</sup> [4-MeOPhO <sup>-</sup> ]/M<br>10 <sup>7</sup> $k_{obs}/s^{-1}$                                                                                                                   | 5.0<br>6.15 | 10.0<br>15.4 | 20.0<br>27.7 | 30.0<br>43.1 | 40.0<br>55.4 | 50.0<br>70.8 |
| F. | Nucleophile = PhO <sup>-</sup><br>10 <sup>4</sup> [PhO <sup>-</sup> ]/M<br>10 <sup>7</sup> $k_{obs}/s^{-1}$                                                                                                                             | 5.0<br>6.15 | 10.0<br>12.3 | 20.0<br>24.6 | 30.0<br>36.9 | 40.0<br>49.2 | 50.0<br>61.5 |
| G. | Nucleophile = 4-ClPhO <sup>-</sup><br>10 <sup>4</sup> [4-ClPhO <sup>-</sup> ]/M<br>10 <sup>7</sup> $k_{obs}/s^{-1}$                                                                                                                     | 5.0<br>5.54 | 10.0<br>9.22 | 20.0<br>19.4 | 30.0<br>30.8 | 40.0<br>40.0 | 50.0<br>52.3 |
| H. | Nucleophile = 3-CNPhO <sup>-</sup><br>10 <sup>4</sup> [3-CNPhO <sup>-</sup> ]/M<br>10 <sup>7</sup> $k_{obs}/s^{-1}$                                                                                                                     | 5.0<br>1.76 | 10.0<br>1.85 | 20.0<br>5.54 | 30.0<br>7.39 | 40.0<br>9.22 | 50.0<br>12.3 |
| I. | Nucleophile = 4-CNPhO <sup>-</sup><br>10 <sup>4</sup> [4-CNPhO <sup>-</sup> ]/M<br>10 <sup>8</sup> $k_{obs}/s^{-1}$                                                                                                                     | 5.0<br>8.79 | 10.0<br>17.6 | 20.0<br>44.0 | 30.0<br>61.5 | 40.0<br>73.9 | 50.0<br>92.2 |
| J. | Nucleophile = 2,5-Cl <sub>2</sub> PhO <sup>-</sup><br>10 <sup>4</sup> [2,5-Cl <sub>2</sub> PhO <sup>-</sup> ]/M<br>10 <sup>8</sup> $k_{obs}/s^{-1}$                                                                                     | 5.0<br>7.68 | 10.0<br>15.4 | 20.0<br>30.7 | 30.0<br>44.0 | 40.0<br>61.5 | 50.0<br>70.3 |
| K. | Nucleophile = 2,4,5-Cl <sub>3</sub> PhO <sup>-</sup><br>10 <sup>4</sup> [2,4,5-Cl <sub>3</sub> PhO <sup>-</sup> ]/M<br>10 <sup>8</sup> $k_{obs}/s^{-1}$                                                                                 | 5.0<br>5.13 | 10.0<br>7.18 | 20.0<br>16.7 | 30.0<br>23.0 | 40.0<br>30.8 | 50.0<br>38.4 |
| L. | Nucleophile = 2,3,5,6-F <sub>4</sub> PhO <sup>-</sup><br>10 <sup>4</sup> [2,3,5,6-F <sub>4</sub> PhO <sup>-</sup> ]/M<br>10 <sup>8</sup> $k_{obs}/s^{-1}$                                                                               | 5.0<br>3.62 | 10.0<br>5.13 | 20.0<br>11.2 | 30.0<br>16.7 | 40.0<br>23.0 | 50.0<br>30.8 |

<sup>a</sup>[Substrate] generally in the range of 3.0-5.0 x 10<sup>-5</sup>M. <sup>b</sup>Reactions were carried out at ionic strength, *I* = 1.0M (KCl).

**Table S2**

Pseudo-First-Order Rate Constants ( $k_{obs}/s^{-1}$ ) for the Reactions of Substituted Aryl Dimethylphosphinates (**3a-g**)<sup>a</sup> with HO<sup>-</sup> and PhO<sup>-</sup> as Nucleophiles in 70% Water-30% Ethanol (v/v) at 25°C<sup>b</sup>

|                                         |                                                                                 |      |      |      |      |      |      |
|-----------------------------------------|---------------------------------------------------------------------------------|------|------|------|------|------|------|
| <b>A. Nucleophile = HO<sup>-</sup></b>  |                                                                                 |      |      |      |      |      |      |
| 1.                                      | Substrate = <b>3a</b> ; leaving group = 4-NO <sub>2</sub> PhO <sup>-</sup>      |      |      |      |      |      |      |
|                                         | 10 <sup>4</sup> [HO <sup>-</sup> ]/M                                            | 5.0  | 10.0 | 20.0 | 30.0 | 40.0 | 50.0 |
|                                         | 10 <sup>4</sup> $k_{obs}/s^{-1}$                                                | 2.60 | 3.10 | 3.80 | 4.74 | 5.64 | 6.39 |
| 2.                                      | Substrate = <b>3b</b> ; leaving group = 4-Cl,3-NO <sub>2</sub> PhO <sup>-</sup> |      |      |      |      |      |      |
|                                         | 10 <sup>4</sup> [HO <sup>-</sup> ]/M                                            | 20.0 | 30.0 | 40.0 | 50.0 |      |      |
|                                         | 10 <sup>4</sup> $k_{obs}/s^{-1}$                                                | 1.18 | 1.74 | 2.11 | 2.48 |      |      |
| 3.                                      | Substrate = <b>3c</b> ; leaving group = 3-NO <sub>2</sub> PhO <sup>-</sup>      |      |      |      |      |      |      |
|                                         | 10 <sup>4</sup> [HO <sup>-</sup> ]/M                                            | 20.0 | 30.0 | 40.0 | 50.0 |      |      |
|                                         | 10 <sup>5</sup> $k_{obs}/s^{-1}$                                                | 8.89 | 11.2 | 13.1 | 24.1 |      |      |
| 4.                                      | Substrate = <b>3d</b> ; leaving group = 3-CNPhO <sup>-</sup>                    |      |      |      |      |      |      |
|                                         | 10 <sup>4</sup> [HO <sup>-</sup> ]/M                                            | 20.0 | 30.0 | 40.0 | 50.0 |      |      |
|                                         | 10 <sup>5</sup> $k_{obs}/s^{-1}$                                                | 6.84 | 8.14 | 9.59 | 10.3 |      |      |
| 5.                                      | Substrate = <b>3e</b> ; leaving group = 3-ClPhO <sup>-</sup>                    |      |      |      |      |      |      |
|                                         | 10 <sup>4</sup> [HO <sup>-</sup> ]/M                                            | 20.0 | 30.0 | 40.0 | 50.0 |      |      |
|                                         | 10 <sup>5</sup> $k_{obs}/s^{-1}$                                                | 6.21 | 6.93 | 7.61 | 8.77 |      |      |
| 6.                                      | Substrate = <b>3f</b> ; leaving group = 4-ClPhO <sup>-</sup>                    |      |      |      |      |      |      |
|                                         | 10 <sup>4</sup> [HO <sup>-</sup> ]/M                                            | 20.0 | 30.0 | 40.0 | 50.0 |      |      |
|                                         | 10 <sup>5</sup> $k_{obs}/s^{-1}$                                                | 4.95 | 5.58 | 5.99 | 5.65 |      |      |
| 7.                                      | Substrate = <b>3g</b> ; leaving group = PhO <sup>-</sup>                        |      |      |      |      |      |      |
|                                         | 10 <sup>4</sup> [HO <sup>-</sup> ]/M                                            | 20.0 | 30.0 | 40.0 | 50.0 |      |      |
|                                         | 10 <sup>5</sup> $k_{obs}/s^{-1}$                                                | 3.47 | 3.58 | 3.63 | 3.68 |      |      |
| <b>B. Nucleophile = PhO<sup>-</sup></b> |                                                                                 |      |      |      |      |      |      |
| 1.                                      | Substrate = <b>3a</b> ; leaving group = 4-NO <sub>2</sub> PhO <sup>-</sup>      |      |      |      |      |      |      |
|                                         | 10 <sup>4</sup> [PhO <sup>-</sup> ]/M                                           | 5.0  | 10.0 | 20.0 | 30.0 | 40.0 | 50.0 |
|                                         | 10 <sup>7</sup> $k_{obs}/s^{-1}$                                                | 6.15 | 12.3 | 24.6 | 36.9 | 49.2 | 61.5 |
| 2.                                      | Substrate = <b>3b</b> ; leaving group = 4-Cl,3-NO <sub>2</sub> PhO <sup>-</sup> |      |      |      |      |      |      |
|                                         | 10 <sup>4</sup> [PhO <sup>-</sup> ]/M                                           | 20.0 | 30.0 | 40.0 | 50.0 |      |      |
|                                         | 10 <sup>7</sup> $k_{obs}/s^{-1}$                                                | 8.25 | 12.4 | 16.5 | 20.6 |      |      |
| 3.                                      | Substrate = <b>3c</b> ; leaving group = 3-NO <sub>2</sub> PhO <sup>-</sup>      |      |      |      |      |      |      |
|                                         | 10 <sup>4</sup> [PhO <sup>-</sup> ]/M                                           | 20.0 | 30.0 | 40.0 | 50.0 |      |      |
|                                         | 10 <sup>7</sup> $k_{obs}/s^{-1}$                                                | 3.23 | 4.85 | 6.47 | 8.07 |      |      |
| 4.                                      | Substrate = <b>3d</b> ; leaving group = 3-CNPhO <sup>-</sup>                    |      |      |      |      |      |      |
|                                         | 10 <sup>4</sup> [PhO <sup>-</sup> ]/M                                           | 20.0 | 30.0 | 40.0 | 50.0 |      |      |
|                                         | 10 <sup>7</sup> $k_{obs}/s^{-1}$                                                | 2.64 | 3.96 | 5.27 | 6.60 |      |      |
| 5.                                      | Substrate = <b>3e</b> ; leaving group = 3-ClPhO <sup>-</sup>                    |      |      |      |      |      |      |
|                                         | 10 <sup>4</sup> [PhO <sup>-</sup> ]/M                                           | 20.0 | 30.0 | 40.0 | 50.0 |      |      |
|                                         | 10 <sup>7</sup> $k_{obs}/s^{-1}$                                                | 1.34 | 2.00 | 2.67 | 3.34 |      |      |
| 6.                                      | Substrate = <b>3f</b> ; leaving group = 4-ClPhO <sup>-</sup>                    |      |      |      |      |      |      |
|                                         | 10 <sup>4</sup> [PhO <sup>-</sup> ]/M                                           | 20.0 | 30.0 | 40.0 | 50.0 |      |      |
|                                         | 10 <sup>8</sup> $k_{obs}/s^{-1}$                                                | 7.25 | 7.78 | 15.6 | 16.8 |      |      |

<sup>a</sup>[Substrate] generally in the range of 3.0-5.0 x 10<sup>-5</sup>M. <sup>b</sup>Reactions were carried out at ionic strength, *I* = 1.0M (KCl).
